# Supplementary material
Source: Springer Nature journal article supplement (http://www.springermedizin.de/resource/supplementary/13054_2012_632_MOESM2_ESM.pdf/9708898)
Supplement: MOESM2 [file 9708898]

Endotracheal intubations  
N = 274

2009-2010:  
endotracheal intubations  
N = 140

Intubating endoscope: N = 18

Others: N = 9

ML: N = 113

Intubation attempts:  
1 attempt: N = 90 (80%)  
2 attempts: N = 15 (13%)  
≥ 3 attempts: N = 8 (7%)

2010-2011:  
endotracheal intubations  
N = 134

Intubating endoscope: N = 5

Others: N = 12 (8 ML)

C-MAC: N = 117

Intubation attempts:  
1 attempt: N = 103 (88%)  
2 attempts: N = 10 (9%)  
≥ 3 attempts: N = 4 (3%)
